# Supplementary figures and images for: Feasibility, Reproducibility and Reference Ranges of Left Atrial Strain in Preterm and Term Neonates in the First 48 h of Life
Source: MDPI journal article supplement (doi:10.3390/diagnostics12020350), 2022-01-29

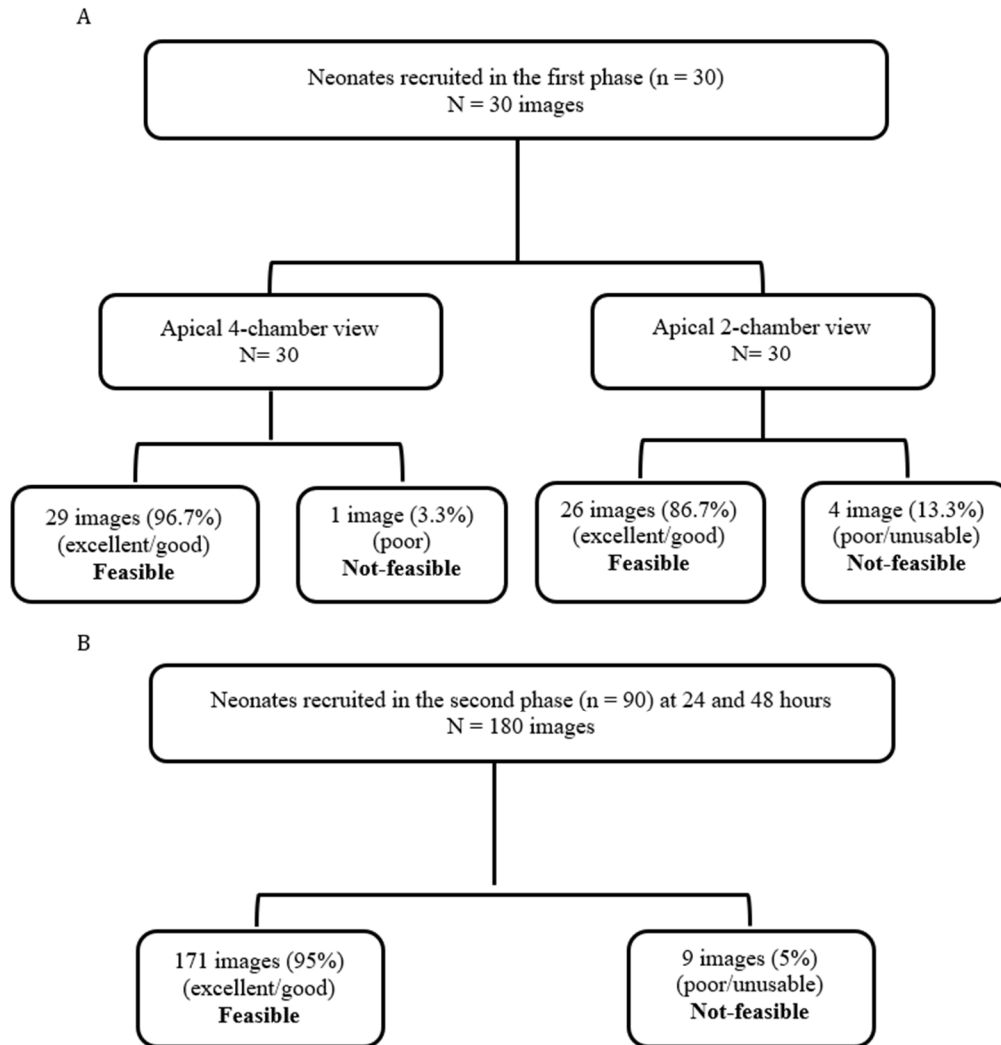

**Figure S1.** Feasibility flow chart for (A) the first phase and (B) the second phase of the study.

Supplement: s1 [file s1]
